# Supplementary material for: Atmospheric methane since the LGM was driven by wetland sources
Source: Copernicus journal article supplement (doi:10.5194/cp-2022-80), 2022-10-17
Supplement: Supplementary file [file cp-2022-80-RC1-supplement.pdf]

## Summary

Kleinen et al. modelled the transient evolution of atmospheric methane mole fraction during the last deglaciation with a fully coupled Earth System model (ESM). As mentioned in the Introduction section of this paper, so far studies of glacial-interglacial methane cycles have been limited to simple box model exercises or ESM runs on steady state time slices. This manuscript provides a valiant first attempt to bridge the knowledge gap and provide valuable insights into the transient dynamics of Earth's methane system. Some of the highlight findings from this manuscript include

- Modeled prediction and improved mechanistic understanding about which part of the Earth's wetland region is most responsible for CH<sub>4</sub> emissions associated with changes in AMOC during D-O#1 (OD-Bolling transition) and Younger Dryas-Preboreal transition. This provides a testable hypothesis for future CH<sub>4</sub> inter-polar gradient measurements from ice cores once the issue with *in situ* production in dusty Greenland ice (Lee et al., 2020) is dealt with. Furthermore, this in itself is also a good benchmark on how good this model is in predicting future CH<sub>4</sub> emission (Kleinen et al., 2021).
- Constraints on how the CH<sub>4</sub> lifetime (and oxidative capacity of the atmosphere) responded to CH<sub>4</sub> emissions and how it can feedback back into the atmospheric CH<sub>4</sub> burden during periods of abrupt CH<sub>4</sub> rises
- Further emphasis on the importance of tropical wetlands for the global CH<sub>4</sub> cycle, in agreement with top-down results from ice cores (e.g., Rhodes et al., 2015; Bock et al., 2017) and modern/recent top-down results (Lunt et al., 2019; Shaw et al., 2022).

I find the manuscript to be very well-written and enjoyable to read. The model input and results are discussed in sufficient details. I would highly recommend this manuscript for publication after some minor revisions. Kleinen et al. is sitting on a trove of important first results, and I think some of the additional data they already have from this experiment (such as inter-polar gradient, simulated CH<sub>4</sub> mole fraction in the tropics, latitude binned CH<sub>4</sub> sink(s?), further details below) can be presented in a way that is more accessible and useful for future ice core/paleo CH<sub>4</sub> studies. Furthermore, the discussion section of this manuscript is a bit short, and I think after conducting these experiments, Kleinen et al. is in a unique position to provide us with further insights about the glacial-interglacial methane dynamics and the role of some of the smaller CH<sub>4</sub> sources (either quantitatively or qualitatively, will be elaborated further below).

## General comments

One of the peculiar things about Kleinen et al. simulations is the relatively low fire emissions (Figure 3c, lower than 10 Tg CH<sub>4</sub>/yr during the Holocene), which I think disagree with most paleodata we have. From CH<sub>4</sub> stable isotopes Bock et al. (2017) calculated certain acceptable solutions for total geological + fire CH<sub>4</sub> emissions during the Holocene (Fig. 2 of their paper). If geological emissions is small (as constrained by the 14CH<sub>4</sub> data and assumed in this study), then fire emissions has to be fairly large (on the order of 22-55 Tg CH<sub>4</sub>/yr) (Dyonisius et al., 2020) to balance and produce such a heavy d<sup>13</sup>C-CH<sub>4</sub> and d<sup>2</sup>D-CH<sub>4</sub> signature recorded in ice core.

Measurements of other trace gases in ice cores that are co-emitted by fires (mainly CO, ethane and acetylene) (Wang et al., 2010; Nicewonger et al., 2020) also predict Holocene fire emissions (say around ~1000 CE) that is higher/comparable to modern day fire emissions (that is anthropogenic + wildfire total

emissions corresponding to  $\sim 40\text{Tg CH}_4$  per year). On the other hand, the global charcoal index (which is a bit more qualitative than trace gases in ice core) predict Holocene fire emissions that is a bit lower than modern (e.g., Marlon et al., 2008). So I think it is fair to say that the paleofire proxies are a bit all over the place, as they don't even agree with one another. However, even the charcoal record does not predict late Holocene fire emissions so low that it is less than  $\sim 1/3^{\text{rd}}$  of total anthropogenic + wildfire emissions today.

Other than being a sizeable portion of the natural  $\text{CH}_4$  budget, fire emissions are obviously important because  $\text{NO}_x$ , aerosol,  $\text{CO}$ , and  $\text{NHMC}$  (non methane hydrocarbon) emissions that affect the oxidative capacity of the atmosphere and  $\text{CH}_4$  lifetime. I understand that the low fire emissions used in Kleinen et al. simulations are simply the result from the well-cited SPITFIRE model (Lasslop et al., 2014) they used and there is nothing wrong with that. It might be prohibitively expensive to rerun the transient experiment or conduct sensitivity analysis with larger fire emissions, I'm not sure. If a simple sensitivity analysis is not possible, I think at least Kleinen et al. should address this disagreement and maybe qualitatively discuss how their results would've changed if Holocene fire emissions as predicted by paleofire proxies mentioned above (and by extension maybe also LGM?) were a bit higher.

On a similar vein, the glacial-interglacial variability in  $\text{CH}_4$  uptake by soil seems a bit low (only  $\pm$  couple of  $\text{Tg CH}_4/\text{yr}$  over the whole deglaciation). Recent findings (for example Oh et al., 2020) suggest a much more dynamic soil uptake (at least in the high latitude) that can respond on decadal timescale to offset high arctic  $\text{CH}_4$  emissions associated with modern warming. Again, I do not expect Kleinen et al. to rerun the transient experiment with more sensitive/variable soil uptake parameter, but it would be nice if this is maybe qualitatively addressed in the discussion section.

In Section 2.3 where Kleinen et al. discuss atmospheric methane sink, it is also not immediately clear whether they explicitly include  $\text{CH}_4$  sink from reaction with chlorine (Allan et al., 2007). I presume that the chlorine sink is somewhere in there, considering ECHAM/MESSy model used in this study have been previously used to argue that the  $\text{CH}_4$  sink from tropospheric  $\text{Cl}$  reaction at the present is low (Gromov et al., 2018). It would be nice if this is explicitly clarified in the manuscript. Furthermore, although the  $\text{Cl}$  sink might be low, it has important effect on  $\text{CH}_4$  stable isotopes. If Kleinen et al. have a proper quantitative attribution to the temporal evolution of each individual  $\text{CH}_4$  sink (e.g., relative contributions from tropospheric  $\text{Cl}$  sink vs. reaction with  $\text{OH}$ , and other  $\text{CH}_4$  sinks such as stratosphere destruction,  $\text{O}(1\text{D})$ ) during the deglaciation, an additional figure showing these parameters and short discussion would greatly benefit future studies of  $\text{CH}_4$  mole fraction and isotopes in ice core. It would also be highly beneficial to see a similar figure to figure 11a ( $\text{CH}_4$  flux by latitude band) but for  $\text{CH}_4$  sink/lifetime if such parameter exists and saved in the model runs. Finally, it is also okay if these sink attributions are not explicitly available, but that should also be mentioned/discussed if Kleinen et al. think the relative importance of one vs. other can potentially change during the deglaciation.

Interpretations of  $\text{CH}_4$  studies from ice cores are often limited to 2 or 3 box models due to the practical limitation that we only have measurements from Greenland and Antarctic ice cores. A peculiar feature in some time slice paleo  $\text{CH}_4$  reconstruction from models (e.g., Murray et al., 2014) is that the  $\text{CH}_4$  mole fraction in the tropics is higher than in  $\text{CH}_4$  mole fraction in both poles during the LGM. Unfortunately, we cannot reliably measure and reconstruct tropical  $\text{CH}_4$  mole fraction from tropical/low-latitude alpine ice cores due to in situ production from organics in alpine ice cores. If  $\text{CH}_4$  mole fraction in the tropics (say in  $30\text{S}$  to  $30\text{N}$  lat bin) is indeed higher than the northern hemisphere, then obviously the 2, 3 box

model inversions commonly used in ice core studies (e.g., Chappellaz et al., 1997; Baumgartner et al., 2012) are inaccurate. The CH<sub>4</sub> mole fraction in the tropics is a balance between CH<sub>4</sub> emissions (which is highest in the tropics) and removal by OH (which is also highest in the tropics) – both of which can only be addressed with fully coupled CTM-ESM like the one used by Kleinen et al. It would greatly benefit the paleo-CH<sub>4</sub> community, both experimentalists and modelers if Kleinen et al. can add to their figure 2 their reconstructed CH<sub>4</sub> concentration over the tropics (despite the lack of data constraints) and provide some additional discussion about how reasonable they think their LGM simulation is (with focus on whether CH<sub>4</sub> in the tropics is higher/lower than CH<sub>4</sub> in Greenland during the LGM).

I'm also interested in the fact that in the transient simulations, the first abrupt CH<sub>4</sub> spike seen by Kleinen et al. in both base and MWM scenario coincidentally occurred at 16 ka, concurrent with Heinrich stadial 1 (HS1) event. It might not be immediately obvious at first, but there is also a small and abrupt CH<sub>4</sub> spike at 16 ka associated with HS1 (Rhodes et al., 2015). It has been argued that this small HS1 CH<sub>4</sub> increase is due to southward movement in ITCZ activating/intensifying emissions from southern hemisphere wetlands (Seltzer et al., 2017; Rhodes et al., 2015).

In page 10 line 223, Kleinen et al. mentioned that they unfortunately do not have this equivalent HS1 event in their simulation, at least in term of AMOC signature. They argued that the CH<sub>4</sub> rise they see at 16ka is actually D-O#1/OD-BO happening too early in the model. But I think the 16 ka coincidence warrants further investigation and discussion. I'm especially interested if Kleinen et al. think that there are any "Heinrich-like" events recorded somewhere in either the base or MWP simulations – for example, maybe the weakened AMOC state at ~15.5-14ka in the MWM simulation (figure 1)? There are other indicators for Heinrich stadial on top of AMOC strength (like for example sea ice extent, Antarctic temperature, etc.) to check.

Heinrich events are particularly important in term of NH ice sheet evolution during the deglaciation. It would be very interesting to see additional discussion in this manuscript (doesn't have to be very long) on whether there is a Heinrich-like event in these simulations. If there is any, how this Heinrich like events affect the spatial distribution of CH<sub>4</sub> emissions and if there is not, how the lack of 'Heinrich-like' event in the simulations affect the robustness of the interpretation (in term of say, sensitivity of CH<sub>4</sub> emissions to AMOC changes driven by melting NH ice sheet).

Finally, if possible, I would highly recommend the authors to add the relatively simple time series data, especially the ones produced by their simulations (time series data to plot figure 3a, 3b, 3c, 4c, 7a,7b, 11a,11b) in the supplementary section of this paper, or somewhere online and easily accessible.

### Line comments

Page 1 line 13: "four points in time". Not sure where the 4<sup>th</sup> abrupt CH<sub>4</sub> transition is. I can only see 3 abrupt transitions during Termination 1, OD-BO CH<sub>4</sub> rise, Allerod-YD CH<sub>4</sub> drop, and YD-PB CH<sub>4</sub> rise.

Page 2 line 41: "We investigated methane emissions [...] 5000 years *apart* from the LGM"; "*apart*" is not clear, I would change it to "*before* the LGM"

Page 3 line 69-70 "Methane emissions from wildfires ..." word by word repeated in page 4 line 100. Alter one of either sentence by a little bit.

Page 5 line 140: I might have missed it, but I think "PFT" is not defined anywhere in this paper

Page 8 figure 1: The purpose of this figure is to provide broad overview of the model parameters and metric in term of T1 deglaciation. In my opinion, plotting some actual data on top would greatly help readers evaluate these model metrics. For example, for global mean temperature (fig. 1a) I think it would be nice to see Shakun et al. (2012) temperature reconstruction on top. It would be nice if atmospheric CO<sub>2</sub> is plotted on the second y-axis of fig. 1c. Finally, another important metric that should be easily trackable in transient climate model simulation is mean ocean temperature (as integrator of various other metrics such as ice volume, sea level, AMOC strength etc). Mean ocean temperature can be plotted next to noble gas based mean ocean temperature reconstruction from ice cores (e.g., Baggenstos et al., 2019).

Page 9 fig2: As I mentioned above, CH<sub>4</sub> concentration over the tropics would be very beneficial to plot here despite the lack of data constraints. Furthermore, the CH<sub>4</sub> inter polar gradient (see Eq. 1 in Brook et al., 2000) is a commonly calculated analytical metric in ice core (Baumgartner et al., 2012; Sowers, 2010; Brook et al., 2000) and it would be great if it the CH<sub>4</sub> inter polar gradient from the simulation runs can be calculated and presented in this figure. Finally, the missing Greenland ice core data at ~16 – 14ka is fair; but between 10-2ka, since it is the Holocene (which is not as dusty as the LGM), Greenland mole fraction from ice core is only minimally affected by in situ production (Lee et al., 2020). As such, I would highly recommend the authors to plot composite Greenland CH<sub>4</sub> mole fraction by Beck et al. (2018).

Page 22 line 389: I would disagree with the assumption that all oceanic CH<sub>4</sub> emission is geologic. There is a small amount of CH<sub>4</sub> emissions from the open ocean due to decomposition/cycling of organic matter (Weber et al., 2019). This would likely have small impact on the overall result of the paper, but needs to be acknowledged.

## References

Allan, W., Struthers, H., and Lowe, D. C.: Methane carbon isotope effects caused by atomic chlorine in the marine boundary layer: Global model results compared with Southern Hemisphere measurements, *Journal of Geophysical Research-Atmospheres*, 112, D04306, <https://doi.org/10.1029/2006jd007369>, 2007.

Baggenstos, D., Häberli, M., Schmitt, J., Shackleton, S. A., Birner, B., Severinghaus, J. P., Kellerhals, T., and Fischer, H.: Earth's radiative imbalance from the Last Glacial Maximum to the present, *Proceedings of the National Academy of Sciences*, 116, 14881–14886, 2019.

Baumgartner, M., Schilt, A., Eicher, O., Schmitt, J., Schwander, J., Spahni, R., Fischer, H., and Stocker, T. F.: High-resolution inter polar difference of atmospheric methane around the Last Glacial Maximum, 2012.

Beck, J., Bock, M., Schmitt, J., Seth, B., Blunier, T., and Fischer, H.: Bipolar carbon and hydrogen isotope constraints on the Holocene methane budget, *Biogeosciences*, 15, 7155–7175, <https://doi.org/10.5194/bg-15-7155-2018>, 2018.

Bock, M., Schmitt, J., Beck, J., Seth, B., Chappellaz, J., and Fischer, H.: Glacial/interglacial wetland, biomass burning, and geologic methane emissions constrained by dual stable isotopic CH<sub>4</sub> ice core records, *PNAS*, 201613883, <https://doi.org/10.1073/pnas.1613883114>, 2017.

Brook, E. J., Harder, S., Severinghaus, J., Steig, E. J., and Sucher, C. M.: On the origin and timing of rapid changes in atmospheric methane during the Last Glacial Period, *Global Biogeochem. Cycles*, 14, 559–572, <https://doi.org/10.1029/1999GB001182>, 2000.

Chappellaz, J., Blunier, T., Kints, S., Dällenbach, A., Barnola, J.-M., Schwander, J., Raynaud, D., and Stauffer, B.: Changes in the atmospheric CH<sub>4</sub> gradient between Greenland and Antarctica during the Holocene, *J. Geophys. Res.*, 102, 15987–15997, <https://doi.org/10.1029/97JD01017>, 1997.

Dyonisius, M. N., Petrenko, V. V., Smith, A. M., Hua, Q., Yang, B., Schmitt, J., Beck, J., Seth, B., Bock, M., Hmiel, B., Vimont, I., Menking, J. A., Shackleton, S. A., Baggenstos, D., Bauska, T. K., Rhodes, R. H., Sperlich, P., Beaudette, R., Harth, C., Kalk, M., Brook, E. J., Fischer, H., Severinghaus, J. P., and Weiss, R. F.: Old carbon reservoirs were not important in the deglacial methane budget, *Science*, 367, 907–910, <https://doi.org/10.1126/science.aax0504>, 2020.

Gromov, S., Brenninkmeijer, C. A. M., and Jöckel, P.: A very limited role of tropospheric chlorine as a sink of the greenhouse gas methane, *Atmospheric Chemistry and Physics*, 18, 9831–9843, <https://doi.org/10.5194/acp-18-9831-2018>, 2018.

Kleinen, T., Gromov, S., Steil, B., and Brovkin, V.: Atmospheric methane underestimated in future climate projections, *Environ. Res. Lett.*, 16, 094006, <https://doi.org/10.1088/1748-9326/ac1814>, 2021.

Lasslop, G., Thonicke, K., and Kloster, S.: SPITFIRE within the MPI Earth system model: Model development and evaluation, *Journal of Advances in Modeling Earth Systems*, 6, 740–755, <https://doi.org/10.1002/2013MS000284>, 2014.

Lee, J. E., Edwards, J. S., Schmitt, J., Fischer, H., Bock, M., and Brook, E. J.: Excess methane in Greenland ice cores associated with high dust concentrations, *Geochimica et Cosmochimica Acta*, 270, 409–430, 2020.

Lunt, M. F., Palmer, P. I., Feng, L., Taylor, C. M., Boesch, H., and Parker, R. J.: An increase in methane emissions from tropical Africa between 2010 and 2016 inferred from satellite data, *Atmospheric Chemistry and Physics*, 19, 14721–14740, <https://doi.org/10.5194/acp-19-14721-2019>, 2019.

Marlon, J. R., Bartlein, P. J., Carcaillet, C., Gavin, D. G., Harrison, S. P., Higuera, P. E., Joos, F., Power, M. J., and Prentice, I. C.: Climate and human influences on global biomass burning over the past two millennia, *Nature Geoscience*, 1, 697–702, <https://doi.org/10.1038/ngeo313>, 2008.

Murray, L. T., Mickley, L. J., Kaplan, J. O., Sofen, E. D., Pfeiffer, M., and Alexander, B.: Factors controlling variability in the oxidative capacity of the troposphere since the Last Glacial Maximum, *Atmos. Chem. Phys.*, 14, 3589–3622, 2014.

Nicewonger, M. R., Aydin, M., Prather, M. J., and Saltzman, E. S.: Extracting a History of Global Fire Emissions for the Past Millennium From Ice Core Records of Acetylene, Ethane, and Methane, *Journal of Geophysical Research: Atmospheres*, 125, e2020JD032932, <https://doi.org/10.1029/2020JD032932>, 2020.

Oh, Y., Zhuang, Q., Liu, L., Welp, L. R., Lau, M. C. Y., Onstott, T. C., Medvigy, D., Bruhwiler, L., Dlugokencky, E. J., Hugelius, G., D’Imperio, L., and Elberling, B.: Reduced net methane emissions due to

microbial methane oxidation in a warmer Arctic, *Nature Climate Change*, 10, 317–321, <https://doi.org/10.1038/s41558-020-0734-z>, 2020.

Rhodes, R. H., Brook, E. J., Chiang, J. C., Blunier, T., Maselli, O. J., McConnell, J. R., Romanini, D., and Severinghaus, J. P.: Enhanced tropical methane production in response to iceberg discharge in the North Atlantic, *Science*, 348, 1016–1019, 2015.

Seltzer, A. M., Buizert, C., Baggenstos, D., Brook, E. J., Ahn, J., Ji-Woong, Y., and Severinghaus, J. P.: Does  $\delta^{18}\text{O}$  of  $\text{O}_2$  record meridional shifts in tropical rainfall?, *Climate of the Past*, 13, 1323, 2017.

Shakun, J. D., Clark, P. U., He, F., Marcott, S. A., Mix, A. C., Liu, Z., Otto-Bliesner, B., Schmittner, A., and Bard, E.: Global warming preceded by increasing carbon dioxide concentrations during the last deglaciation, *Nature*, 484, 49–54, <https://doi.org/10.1038/nature10915>, 2012.

Shaw, J. T., Allen, G., Barker, P., Pitt, J. R., Pasternak, D., Bauguitte, S. J.-B., Lee, J., Bower, K. N., Daly, M. C., Lunt, M. F., Ganesan, A. L., Vaughan, A. R., Chibesakunda, F., Lambakasa, M., Fisher, R. E., France, J. L., Lowry, D., Palmer, P. I., Metzger, S., Parker, R. J., Gedney, N., Bateson, P., Cain, M., Lorente, A., Borsdorff, T., and Nisbet, E. G.: Large Methane Emission Fluxes Observed From Tropical Wetlands in Zambia, *Global Biogeochemical Cycles*, 36, e2021GB007261, <https://doi.org/10.1029/2021GB007261>, 2022.

Sowers, T.: Atmospheric methane isotope records covering the Holocene period, *Quaternary Science Reviews*, 29, 213–221, <https://doi.org/10.1016/j.quascirev.2009.05.023>, 2010.

Wang, Z., Chappellaz, J., Park, K., and Mak, J. E.: Large Variations in Southern Hemisphere Biomass Burning During the Last 650 Years, *Science*, 330, 1663–1666, <https://doi.org/10.1126/science.1197257>, 2010.

Weber, T., Wiseman, N. A., and Kock, A.: Global ocean methane emissions dominated by shallow coastal waters, *Nat Commun*, 10, 4584, <https://doi.org/10.1038/s41467-019-12541-7>, 2019.
